# Supplementary material
Source: PubMed Central journal article supplement (PMC1312392)

**A**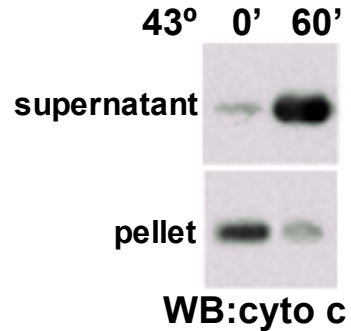**B**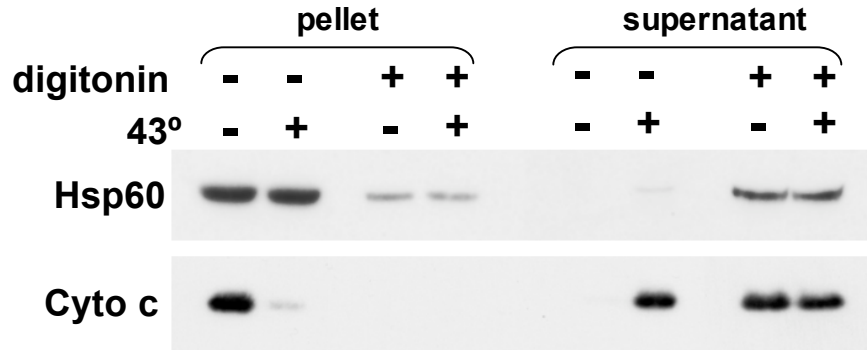

Supplement: pnas_0506712102_2.pdf [file pnas_0506712102_2.pdf]
